# Supplementary material for: Phosphoric acid-assisted synthesis of layered MoS2/graphene hybrids with electrolyte-dependent supercapacitive behaviors
Source: Royal Society of Chemistry journal article supplement (doi:10.1039/c6ra17109e), 2016-01-01
Supplement: c6ra17109e1.pdf [file c6ra17109e1.pdf]

## Supporting information

### Phosphoric acid-assisted synthesis of layered MoS<sub>2</sub>/graphene hybrids with electrolyte-dependent supercapacitive behaviors

Bingqiao Xie<sup>a</sup>, Ying Chen<sup>a\*</sup>, Mengying Yu<sup>a</sup>, Shanshan Zhang<sup>a</sup>, Luhua Lu<sup>a\*</sup>, Zhu Shu<sup>a</sup>,  
Yong Zhang<sup>b,c</sup>

<sup>a</sup> Engineering Research Center of Nano-Geomaterials of Ministry of Education, Department of Materials, China University of Geosciences, Wuhan 388 Lumo RD, Wuhan 430074, China

<sup>b</sup>School of Materials Science and Engineering, Hefei University of Technology, Hefei, 230009, China

<sup>c</sup>Key Laboratory of Advanced Functional Materials and Devices of Anhui Province, Hefei, 230009, China

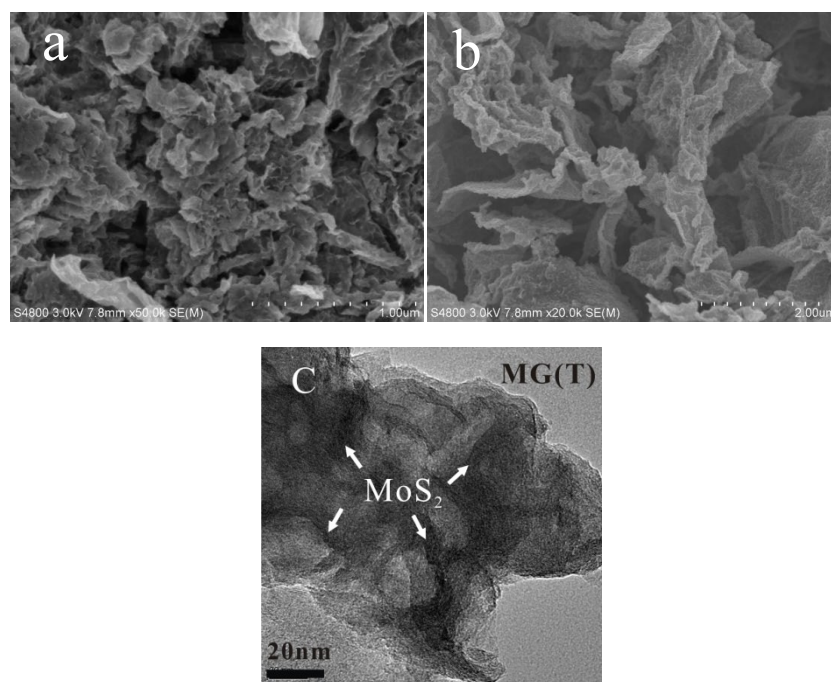

**Figure S1.** The additional SEM pictures of a) P-MG, b)P-MG(T), and c)TEM picture of MG(T).

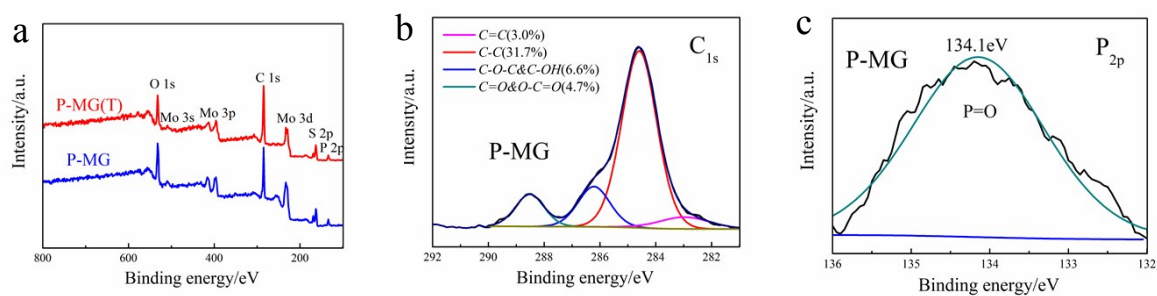

**Figure S2.** a) XPS survey spectra of P-MG and P-MG(T), b) C 1s spectra of P-MG; c) P 2p spectra of P-MG.

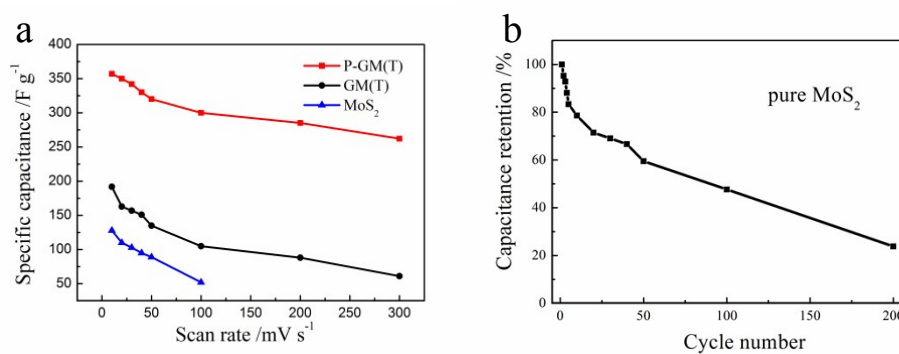

**Figure S3.** a) Calculated  $C_{sp}$  value for three samples from CV curves in acidic electrolyte; b) cycling performance of pure  $\text{MoS}_2$ .

**Table S1.** XPS analysis results and electrochemical properties of the samples.

| Sample         | XPS analysis(atom%) |      |     |      |      | $C_{sp}(\text{F g}^{-1})$ at $2\text{A g}^{-1}$ |                            |
|----------------|---------------------|------|-----|------|------|-------------------------------------------------|----------------------------|
|                | C                   | O    | P   | S    | Mo   | 6M KOH                                          | 1M $\text{H}_2\text{SO}_4$ |
| $\text{MoS}_2$ |                     |      |     | 67.5 | 32.5 | 36                                              | 42                         |
| MG             | 40.3                | 14.8 |     | 30.1 | 14.8 |                                                 |                            |
| MG(T)          | 45.3                | 9.5  |     | 30.3 | 14.9 | 172                                             | 164                        |
| P-MG           | 46                  | 16.2 | 1.3 | 24.5 | 12.0 |                                                 |                            |
| P-MG(T)        | 50.9                | 12.1 | 1.1 | 24.1 | 11.8 | 258                                             | 351                        |

Table S2. Electrochemical performance of MoS<sub>2</sub>/graphene composite

| Electrode materials               | Involved precursors (preparation method)                                                                             | Capacitance value(F/g)    | Cycling retention         | Electrolyte                        | Ref.      |
|-----------------------------------|----------------------------------------------------------------------------------------------------------------------|---------------------------|---------------------------|------------------------------------|-----------|
| MoS <sub>2</sub> -Gr              | GO+Na <sub>2</sub> MoO <sub>4</sub> +L-cysteine (hydrothermal)                                                       | 243(1A/g)<br>130(5A/g)    | 92.3% (1000 cycles 1A/g)  | 1M Na <sub>2</sub> SO <sub>4</sub> | 1         |
| MoS <sub>2</sub> /RGO             | GO+(NH <sub>4</sub> ) <sub>6</sub> Mo <sub>7</sub> O <sub>24</sub> +NH <sub>2</sub> CSNH <sub>2</sub> (hydrothermal) | 249(0.3A/g)<br>~173(5A/g) | 93.6%(1000 cycles 2A/g)   | 1M H <sub>2</sub> SO <sub>4</sub>  | 2         |
| MoS <sub>2</sub> /RGO             | GO(DMF)+MoCl <sub>5</sub> +butyl mercaptan (microwave)                                                               | 205(80mV/s)               | 92%(1000 cycles CV data)  | 1M HClO <sub>4</sub>               | 3         |
| MoS <sub>2</sub> -GNs             | graphite+MoS <sub>2</sub> pellets (layer-by-layer)                                                                   | 255(2A/g)                 | 93%(1000 cycles 1A/g)     | 1M Na <sub>2</sub> SO <sub>4</sub> | 4         |
| MoS <sub>2</sub> /NG(1.5)         | GO+Na <sub>2</sub> MoO <sub>4</sub> +L-cysteine (hydrothermal)                                                       | 245(0.25A/g)<br>196(5A/g) | 91.3%(1000 cycles 2A/g)   | 6M KOH                             | 5         |
| MoS <sub>2</sub> /Carbon aerogel  | Carbon aerogel+Na <sub>2</sub> MoO <sub>4</sub> +L-cysteine (hydrothermal)                                           | 260(1A/g)<br>179.9(10A/g) | 92.4%(1500 cycles 1A/g)   | 1M Na <sub>2</sub> SO <sub>4</sub> | 6         |
| MoS <sub>2</sub> /C composite     | ammonium molybdate+ thiourea (hydrothermal)                                                                          | 201(0.2A/g)               | 89.4%(1000 cycles 0.2A/g) | 1M Na <sub>2</sub> SO <sub>4</sub> | 7         |
| NC-MoS <sub>2</sub>               | Li <sub>x</sub> MoS <sub>2</sub> +dopamine hydrochloride (calcination)                                               | 158(0.5A/g)               | 89%(1000 cycles 1A/g)     | 1M Na <sub>2</sub> SO <sub>4</sub> | 8         |
| 3D MoS <sub>2</sub> /CMG          | MoS <sub>2</sub> nanosheets+GO (hydrothermal)                                                                        | 268(0.5A/g)               | 93%(1000 cycles 1A/g)     | 1M Na <sub>2</sub> SO <sub>4</sub> | 9         |
| MoS <sub>2</sub> /G nanocomposite | Thioacetamide+ammonium heptamolybdate+GO (hydrothermal)                                                              | 270(0.1A/g)               | 89.6%(1000 cycles 0.6A/g) | 1M Na <sub>2</sub> SO <sub>4</sub> | 10        |
| P-MG(T)                           | Na <sub>2</sub> MoO <sub>4</sub> +L-cysteine +CTAB+H <sub>3</sub> PO <sub>4</sub> +GO (hydrothermal)                 | 351(2A/g)<br>225(10A/g)   | 89.5% (1000 cycles 4A/g)  | 1M H <sub>2</sub> SO <sub>4</sub>  | this work |

## References

- [1] K.-J. Huang, L. Wang, Y.-J. Liu, Y.-M. Liu, H.-B. Wang, T. Gan and L.-L. Wang, *Int. J. Hydrogen Energ.*, 2013, **38**, 14027-14034.
- [2] K. Gopalakrishnan, K. Pramoda, U. Maitra, U. Mahima, M.A. Shah and C.N.R. Rao, *Nanomaterials and Energy*, 2014. DOI: 10.1680/nme.14.00024.
- [3] E.G. da Silveira Firmiano, A.C. Rabelo, C.J. Dalmaschio, A.N. Pinheiro, E.C. Pereira, W.H. Schreiner and E.R. Leite, *Adv. Energy Mater.*, 2014, **4**, 1301380.
- [4] S. Patil, A. Harle, S. Sathaye and K. Patil, *Crystengcomm*, 2014, **16**, 10845-10855.

- [5] B. Xie, Y. Chen, M. Yu, T. Sun, L. Lu, T. Xie, Y. Zhong and Y. Wu, *Carbon*, 2016, **99**, 35-42.
- [6] K.-J. Huang, L. Wang, J.-Z. Zhang and K. Xing, *J. Electroanal. Chem.*, 2015, **752**, 33-40.
- [7] L.-Q. Fan, G.-J. Liu, C.-Y. Zhng, J.-H. Wu and Y.-L. Wei, *Int. J. Hydrogen Energ.*, 2015, **40**, 10150-10157.
- [8] M. Yang, S.-K. Hwang, J.-M. Jeong, Y.S. Huh and B.G. Choi, *Synthetic Met.*, 2015, **209**, 528-533.
- [9] M. Yang, J.-M. Jeong, Y.S. Huh and B.G. Choi, *Compos. Sci. Technol.*, 2015, **121**, 123-128.
- [10] R. Thangappan, S. Kalaiselvam, A. Elayaperumal, R. Jayavel, M. Arivanandhan, R. Karthikeyan and Y. Hayakawa, *Dalton T.*, 2016, **45**, 2637-2646.
